# Supplementary material for: Brief communication: Towards defining the worst-case breach scenarios and potential flood volumes for moraine-dammed lake outbursts
Source: Copernicus journal article supplement (doi:10.5194/egusphere-2025-4136), 2025-10-13
Supplement: Supplementary file 1 [file egusphere-2025-4136-supplement.pdf]

## Supplement to:

### **Brief communication: Towards defining the worst-case breach scenarios and potential flood volumes for moraine-dammed lake outbursts**

5 Adam Emmer<sup>1</sup>, Ashim Sattar<sup>2</sup>, Jan Hrebrina<sup>3</sup>

<sup>1</sup>Department of Geography and Regional Science, University of Graz, 8010 Graz, Austria

<sup>2</sup>School of Earth, Ocean and Climate Sciences, Indian Institute of Technology Bhubaneswar, Bhubaneswar, Odisha, India

<sup>3</sup>Department of Civil and Environmental Engineering, Norwegian University of Science and Technology (NTNU), Trondheim, Norway

10 *Correspondence to:* Adam Emmer (adam.emmer@uni-graz.at OR aemmer@seznam.cz)

Supplement I: The list of analysed events, measured and calculated characteristics.

| RG1 region | Major mountain in which the GLOF occurred | Source location of the GLOF | Name of the glacier that feeds the burst glacier lake | Glacier Name of area the derived outburst from RG1 source polygon lake | Material of the impounding dam | Reported date of GLOF | Y coordinate | X coordinate | breached channel | running number (regionally) | Total volume released during outburst | Elev. lake level | DEM                 | Reference                     |
|------------|-------------------------------------------|-----------------------------|-------------------------------------------------------|------------------------------------------------------------------------|--------------------------------|-----------------------|--------------|--------------|------------------|-----------------------------|---------------------------------------|------------------|---------------------|-------------------------------|
| Low        | Low-                                      | Peru                        | Kogon                                                 | 4.50 Janconaris                                                        | moraine                        | 1950-10-20            | -8.86        | -77.67       | 5.9              | 77                          | 4.00                                  | 4290             | ALOS                | Emmer, 2017                   |
| Low        | Low-                                      | Peru                        | Caraz                                                 | 5.94 Artesonco                                                         | moraine                        | 1951-10-28            | -8.98        | -77.64       | 6.5              | 81                          | 2.80                                  | 4288             | ALOS                | Emmer, 2017                   |
| Low        | Low-                                      | Peru                        | RG160-                                                | 9.02 Julparaju                                                         | moraine                        | 1953-03               | -9.42        | -77.34       | 6.9              | 88                          | 3.10                                  | 4283             | ALOS                | Emmer, 2017                   |
| Low        | Low-                                      | Peru                        | Polcorgu                                              | 6.28 Polcorgoc                                                         | moraine                        | 1941-12-13            | -9.39        | -77.38       | 7.7              | 43                          | 10.00                                 | 4566             | ALOS                | Mergili et al., 2020          |
| Southern   | Patagoni                                  | Chile                       | Engafo                                                | 2.53 Engafo                                                            | moraine                        | 1977-03-11            | -46.45       | -72.97       | 3.2              | 121                         | 12.50                                 | 689              | SRTM                | Anacora, et al., 2015         |
| Southern   | Patagoni                                  | Chile                       | U-7                                                   | 3.05 Cerro                                                             | moraine                        | 1989-03-16            | -46.96       | -73.26       | 2.8              | 177                         | 140.00                                | 436              | SRTM                | Burton et al., 2022           |
| Western    | S Coast                                   | Canada                      | Cumbelta                                              | 2.96 Nostetuko                                                         | moraine                        | 1983-07-19            | 51.21        | -124.41      | 2.3              | 382                         | 6.50                                  | 1594             | CDEM                | Kershaw et al., 2005          |
| Western    | S Coast                                   | Canada                      | Diodem                                                | 6.19 Queen                                                             | moraine                        | 1997-08-12            | 51.28        | -124.52      | 2.8              | 330                         | 6.50                                  | 1701             | CDEM                | Kershaw et al., 2005          |
| Asia,      | E                                         | Nepal                       | CN502528                                              | 8.62 Reilecco                                                          | moraine                        | 1997-08-12            | 27.97        | 88.89        | 3.4              | 382                         | 4.58                                  | 5444             | SRTM                | Ves et al., 2019              |
| Asia,      | E                                         | Nepal                       | RG160-15.02                                           | 6.60 Nagma                                                             | moraine                        | 1980-06-23            | 27.87        | 87.87        | 5.4              | 328                         | 3.00                                  | 4926             | SRTM                | Ves et al., 2011              |
| Asia,      | E                                         | China                       | CN50201                                               | 6.49 Qunbiao                                                           | moraine                        | 1940-07-10            | 27.85        | 88.92        | 4.4              | 117                         | 12.40                                 | 4650             | SRTM                | Nie et al., 2018              |
| Asia,      | S and E                                   | China                       | RG160-                                                | 1.21 Dornemha                                                          | moraine                        | 1964-09-26            | 29.87        | 93.04        | 3.1              | 203                         | 2.00                                  | 5216             | SRTM                | Daoming and Qinghua, 1994     |
| Asia,      | E                                         | China                       | Amociren                                              | 1.42 Zhongtan                                                          | moraine                        | 1981-07-11            | 28.07        | 86.07        | 19.5             | 341                         | 18.90                                 | 4615             | SRTM                | Ives et al., 2011             |
| Asia,      | E                                         | Nepal                       | Longmoo                                               | 1.31 Dig Tho                                                           | moraine                        | 1985-08-04            | 27.87        | 86.59        | 4.3              | 358                         | 8.00                                  | 4373             | SRTM                | Wuichard and Zimmermann, 1987 |
| Asia,      | Hengduo                                   | China                       | Gongzo                                                | 28.82 Guojingke                                                        | moraine                        | 1988-07-14            | 29.47        | 96.50        | 2.8              | 373                         | 3.30                                  | 3837             | SRTM                | Daoming and Qinghua, 1994     |
| Asia,      | E                                         | Nepal                       | Sobal                                                 | 1.77 Tam                                                               | moraine                        | 1998-09-03            | 27.74        | 86.85        | 7.4              | 425                         | 18.00                                 | 4377             | SRTM                | Ives et al., 2011             |
| Asia,      | Inner Tibet                               | China                       | RG160-                                                | 3.902 Chongba                                                          | moraine                        | 2001-08-06            | 28.21        | 89.75        | 5.7              | 442                         | 27.10                                 | 4915             | SRTM                | Ves et al., 2019              |
| Asia,      | S and E                                   | China                       | Jinwu Gloc                                            | 8.383 Jinwuco                                                          | moraine                        | 2020-06-26            | 30.36        | 93.63        | 2.9              | 554                         | 10.00                                 | 4422             | Zheng et al., 2021  |                               |
| Asia,      | E                                         | India                       | South                                                 | 11.71 South                                                            | moraine                        | 2023-10-03            | 27.91        | 88.20        | 2.3              | 667                         | 41.40                                 | 5166             | Soffor et al., 2023 |                               |
| Asia,      | W Tien                                    | Kazakhstan                  | Ortolk                                                | 2.84 No2, No3                                                          | moraine                        | 1973-07-15            | 43.07        | 77.08        | 6.5              | 265                         | 3.80                                  | 3421             | SRTM                | Medeu et al., 2022            |
| Low        | Low-                                      | Peru                        | Caraz                                                 | 5.94 Artesonco                                                         | moraine                        | 1951-07-06            | -8.98        | -77.64       | 6.9              | 80                          | 1.13                                  | 4306             | SRTM                | Emmer, 2017                   |
| Western    | S Coast                                   | Canada                      | Klathesine                                            | 131.11 Klathesine                                                      | moraine                        | 1971 -                | 51.18        | -124.88      | 6.5              | 315                         | 1.70                                  | 1698             | CDEM                | Claque and Evans, 2000        |
| Asia,      | E                                         | Bhutan                      | RG160-                                                | 3.87 Kuangna                                                           | moraine                        | 1990-1991             | 28.09        | 90.33        | 4.6              | 383                         | 1.22                                  | 4711             | SRTM                | Ven et al., 2019              |
| Asia,      | C                                         | China                       | CN50195                                               | 3.31 -                                                                 | moraine                        | 1995-1996             | 28.66        | 85.48        | 7.5              | 408                         | 1.17                                  | 5203             | SRTM                | Ven et al., 2019              |

15    **Supplement II: Mean slope of the breached channels (A) and their relation to outburst volume (B), and elevation (C).**

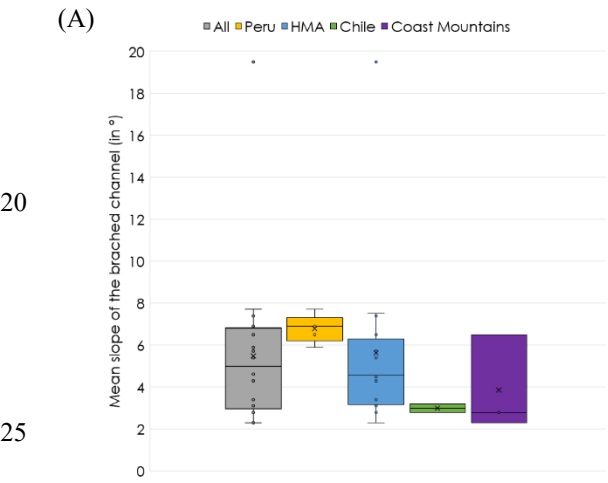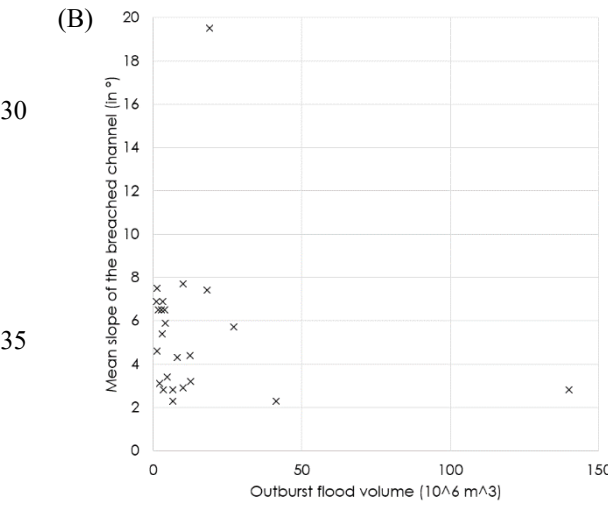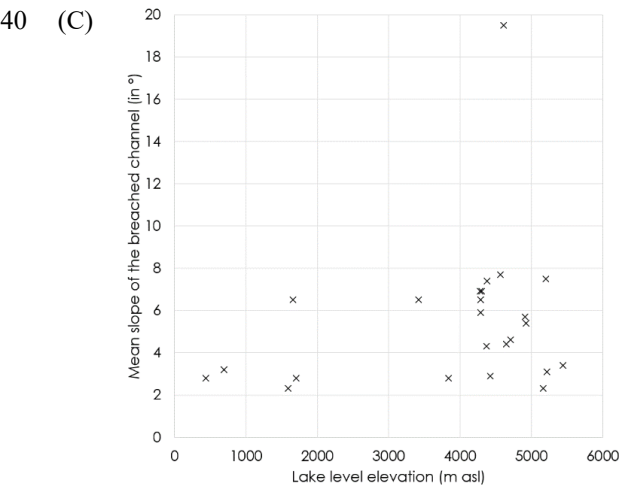

Supplement III: Supplementary input data for the calculations presented in Table 1.

| Lake        | Total flood volume (million m3) | Citation            | Area (m^2) | Toe eleation (m asl) | Crest elevation (m asl) | Outflow (m) | max beach depth (m) | PFV (m^3) |
|-------------|---------------------------------|---------------------|------------|----------------------|-------------------------|-------------|---------------------|-----------|
| Galong co   | 469000000                       | Yang et al., 2023   | 5630000    | 5023                 | 5073                    | 530         | 22,3                | 125334740 |
| Gepan Gath  | 12600000                        | Worni et al., 2013  | 784400     | 4068                 | 4095                    | 400         | 6,1                 | 4757870   |
|             | 12600000                        |                     | 1050000    | 4068                 | 4095                    | 400         | 6,1                 | 6368898   |
| Lower Barun | 179000000                       | Sattar at al 2021   | 2250000    | 4456                 | 4542                    | 878         | 40,0                | 90110318  |
| Lumding     | 5200000                         | Fujita et al., 2013 | 1310000    | 4810                 | 4837                    | 451         | 3,4                 | 4449394   |
| Thorthomi   | 56380000                        | Osti et al., 2023   | 3350000    | 4410                 | 4460                    | 502         | 23,7                | 79486622  |
|             | 56380000                        |                     | 1410000    | 4410                 | 4460                    | 502         | 23,7                | 33455563  |
